# Supplementary material for: The Influence of Social Isolation on Social Orientation, Sociability, Social Novelty Preference, and Hippocampal Parvalbumin-Expressing Interneurons in Peripubertal Rats – Understanding the Importance of Meeting Social Needs in Adolescence
Source: Frontiers journal article supplement (doi:10.3389/fnbeh.2022.872628), 2022-05-03
Supplement: Table_1.pdf [file Table_1.pdf]

**Supplementary Table 1 (S1).**

| Figure 3A                                                                                                                             |                                                                                                                                                           |                   |      |        |                 |                                                                |        |           |       |
|---------------------------------------------------------------------------------------------------------------------------------------|-----------------------------------------------------------------------------------------------------------------------------------------------------------|-------------------|------|--------|-----------------|----------------------------------------------------------------|--------|-----------|-------|
|                                                                                                                                       | Factor: Maturation under given housing conditions<br>early- vs. mid-adolescence,<br>Wilcoxon test                                                         |                   |      |        |                 | Factor: Housing conditions<br>GH vs SH,<br>Mann Whitney U-test |        |           |       |
|                                                                                                                                       |                                                                                                                                                           | N                 | T    | Z      | p               |                                                                | U      | Z         | p     |
| Number of entries in<br>social section<br>(with novel<br>consppecific 1; <b>N1</b> )                                                  | GH                                                                                                                                                        | 7                 | 9.5  | 0.210  | 0.834           | early                                                          | 15     | 1.214     | 0.225 |
|                                                                                                                                       | SH                                                                                                                                                        | 7                 | 7.5  | 0.629  | 0.529           | mid                                                            | 18.5   | 0.767     | 0.443 |
| Number of entries in<br>non-social section<br>(with object; <b>O</b> )                                                                | GH                                                                                                                                                        | 7                 | 8.5  | 0.419  | 0.675           | early                                                          | 14.5   | -1.278    | 0.201 |
|                                                                                                                                       | SH                                                                                                                                                        | 7                 | 8    | 1.014  | 0.310           | mid                                                            | 20     | 0.575     | 0.565 |
| Total number of<br>entries in sections<br>( <b>N1</b> + <b>O</b> )                                                                    | GH                                                                                                                                                        | 7                 | 10   | 0.105  | 0.917           | early                                                          | 21     | 0.447     | 0.655 |
|                                                                                                                                       | SH                                                                                                                                                        | 7                 | 10.5 | 0.592  | 0.554           | mid                                                            | 20.5   | 0.511     | 0.609 |
| Figure 3B                                                                                                                             |                                                                                                                                                           |                   |      |        |                 |                                                                |        |           |       |
|                                                                                                                                       | Two-way repeated measures ANOVA                                                                                                                           |                   |      |        |                 | Tukey (HSD)                                                    |        |           |       |
| Preference<br>based on number of<br>entries in sections<br>( <b>DInes</b> )                                                           | Factor: Housing F (1,12) = 5.852, p = 0.032                                                                                                               |                   |      |        |                 | GH early vs GH mid                                             |        | p = 0.784 |       |
|                                                                                                                                       | Factor: Maturation F (1,12) = 0.001, p = 0.982                                                                                                            |                   |      |        |                 | SH early vs SH mid                                             |        | p = 0.766 |       |
|                                                                                                                                       | Factor: Maturation x Housing F (1,12) = 1.836, p = 0.200                                                                                                  |                   |      |        |                 | GH early vs SH early                                           |        | p = 0.112 |       |
|                                                                                                                                       |                                                                                                                                                           |                   |      |        |                 | GH mid vs SH mid                                               |        | p = 0.788 |       |
| Figure 3C                                                                                                                             |                                                                                                                                                           |                   |      |        |                 |                                                                |        |           |       |
|                                                                                                                                       |                                                                                                                                                           | Early-adolescence |      |        | Mid-adolescence |                                                                |        |           |       |
| Time spent in social section ( <b>N1</b> )<br>vs. time spent in center ( <b>C</b> )<br>(t test for dependent samples)                 |                                                                                                                                                           | t                 | df   | p      | t               | df                                                             | p      |           |       |
|                                                                                                                                       | GH                                                                                                                                                        | 6.232             | 6    | <0.001 | 5.927           | 6                                                              | <0.001 |           |       |
|                                                                                                                                       | SH                                                                                                                                                        | 7.359             | 6    | <0.001 | 6.922           | 6                                                              | <0.001 |           |       |
| Time spent in social section ( <b>N1</b> )<br>vs. time spent in section with<br>object ( <b>O</b> )<br>(t test for dependent samples) |                                                                                                                                                           | t                 | df   | p      | t               | df                                                             | p      |           |       |
|                                                                                                                                       | GH                                                                                                                                                        | 0.194             | 6    | 0.852  | 1.835           | 6                                                              | 0.116  |           |       |
|                                                                                                                                       | SH                                                                                                                                                        | 2.455             | 6    | 0.049  | 2.864           | 6                                                              | 0.029  |           |       |
|                                                                                                                                       | Two-way repeated measures ANOVA                                                                                                                           |                   |      |        |                 | Post hoc test                                                  |        |           |       |
| Time spent in<br>social section ( <b>N1</b> )                                                                                         | Factor: Housing F (1,12) = 1.705, p = 0.216<br>Factor: Maturation F (1,12) = 1.888, p = 0.195<br>Factor: Maturation x Housing F (1,12) = 0.432, p = 0.524 |                   |      |        |                 | not applicable                                                 |        |           |       |
| Time spent in<br>center ( <b>C</b> )                                                                                                  | Factor: Housing F (1,12) = 0.851, p = 0.375<br>Factor: Maturation F (1,12) = 0.559, p = 0.469<br>Factor: Maturation x Housing F (1,12) = 0.066, p = 0.801 |                   |      |        |                 | not applicable                                                 |        |           |       |
| Time spent in<br>section with object<br>( <b>O</b> )                                                                                  | Factor: Housing F (1,12) = 2.385, p = 0.148<br>Factor: Maturation F (1,12) = 1.538, p = 0.239<br>Factor: Maturation x Housing F (1,12) = 0.608, p = 0.451 |                   |      |        |                 | not applicable                                                 |        |           |       |

| Figure 4A                                                   |                                                                                                                                                            |   |       |       |       |                                                                        |       |           |       |
|-------------------------------------------------------------|------------------------------------------------------------------------------------------------------------------------------------------------------------|---|-------|-------|-------|------------------------------------------------------------------------|-------|-----------|-------|
|                                                             | Two-way repeated measures ANOVA                                                                                                                            |   |       |       |       | Tukey (HSD)                                                            |       |           |       |
| Number of approaches to novel conspecific 1 ( <b>N1</b> )   | Factor: Housing F (1,12) = 1.498, p = 0.244<br>Factor: Maturation F (1,12) = 1.831, p = 0.201<br>Factor: Maturation x Housing F (1,12) = 0.011, p = 0.919  |   |       |       |       | Post hoc test not applicable                                           |       |           |       |
| Number of approaches to object ( <b>O</b> )                 | Factor: Housing F (1,12) = 4.280, p = 0.061<br>Factor: Maturation F (1,12) = 7.107, p = 0.021<br>Factor: Maturation x Housing F (1,12) = 5.832, p = 0.033  |   |       |       |       | GH early vs GH mid                                                     |       | p = 0.017 |       |
|                                                             |                                                                                                                                                            |   |       |       |       | SH early vs SH mid                                                     |       | p = 0.998 |       |
|                                                             |                                                                                                                                                            |   |       |       |       | GH early vs SH early                                                   |       | p = 0.068 |       |
|                                                             |                                                                                                                                                            |   |       |       |       | GH mid vs SH mid                                                       |       | p = 0.999 |       |
| Total number of approaches ( <b>N1 + O</b> )                | Factor: Housing F (1,12) = 0.570, p = 0.465<br>Factor: Maturation F (1,12) =10.600, p = 0.007<br>Factor: Maturation x Housing F (1,12) = 3.705, p = 0.078  |   |       |       |       | GH early vs GH mid                                                     |       | p = 0.015 |       |
|                                                             |                                                                                                                                                            |   |       |       |       | SH early vs SH mid                                                     |       | p = 0.784 |       |
|                                                             |                                                                                                                                                            |   |       |       |       | GH early vs SH early                                                   |       | p = 0.301 |       |
|                                                             |                                                                                                                                                            |   |       |       |       | GH mid vs SH mid                                                       |       | p = 0.864 |       |
| Figure 4B                                                   |                                                                                                                                                            |   |       |       |       |                                                                        |       |           |       |
|                                                             | Factor: Maturation under given housing conditions<br>early- vs. mid-adolescence,<br>Wilcoxon test                                                          |   |       |       |       | Factor: Housing conditions<br>GH vs SH,<br>Mann Whitney <i>U</i> -test |       |           |       |
|                                                             |                                                                                                                                                            | N | T     | Z     | p     |                                                                        | U     | Z         | p     |
| Preference based on number of approaches ( <b>DIna</b> )    | GH                                                                                                                                                         | 7 | 8     | 1.014 | 0.310 | early                                                                  | 7     | 2.236     | 0.025 |
|                                                             | SH                                                                                                                                                         | 7 | 14    | 0     | 1     | mid                                                                    | 15    | 1.214     | 0.225 |
| Figure 4C                                                   |                                                                                                                                                            |   |       |       |       |                                                                        |       |           |       |
|                                                             | Two-way repeated measures ANOVA                                                                                                                            |   |       |       |       | Tukey (HSD)                                                            |       |           |       |
| Time spent in novel conspecific 1 ( <b>N1</b> ) exploration | Factor: Maturation<br>early- vs. mid-adolescence,<br>Wilcoxon test                                                                                         |   |       |       |       | Factor: Housing conditions<br>GH vs SH,<br>Mann Whitney <i>U</i> -test |       |           |       |
|                                                             |                                                                                                                                                            |   |       |       |       |                                                                        |       |           |       |
|                                                             |                                                                                                                                                            | N | T     | Z     | p     |                                                                        | U     | Z         | p     |
|                                                             | GH                                                                                                                                                         | 7 | 2     | 2.028 | 0.043 | early                                                                  | 17    | 0.958     | 0.338 |
| SH                                                          | 7                                                                                                                                                          | 5 | 1.153 | 0.249 | mid   | 9.5                                                                    | 1.917 | 0.055     |       |
| Time spent in object ( <b>O</b> ) exploration               | Factor: Housing F (1,12) = 3.023, p = 0.108<br>Factor: Maturation F (1,12) = 18.494, p = 0.001<br>Factor: Maturation x Housing F(1,12) = 16.008, p = 0.002 |   |       |       |       | GH early vs GH mid                                                     |       | p = 0.001 |       |
|                                                             |                                                                                                                                                            |   |       |       |       | SH early vs SH mid                                                     |       | p = 0.997 |       |
|                                                             |                                                                                                                                                            |   |       |       |       | GH early vs SH early                                                   |       | p = 0.107 |       |
|                                                             |                                                                                                                                                            |   |       |       |       | GH mid vs SH mid                                                       |       | p = 1.000 |       |
| Total exploratory time ( <b>N1 + O</b> )                    | Factor: Housing F (1,12) = 0.398, p = 0.540<br>Factor: Maturation F (1,12) = 16.014, p = 0.002<br>Factor: Maturation x Housing F (1,12) = 1.238, p = 0.288 |   |       |       |       | GH early vs GH mid                                                     |       | p = 0.016 |       |
|                                                             |                                                                                                                                                            |   |       |       |       | SH early vs SH mid                                                     |       | p = 0.226 |       |
|                                                             |                                                                                                                                                            |   |       |       |       | GH early vs SH early                                                   |       | p = 0.999 |       |
|                                                             |                                                                                                                                                            |   |       |       |       | GH mid vs SH mid                                                       |       | p = 0.737 |       |

| Figure 4D                                                                                                                              |                                                                                                                                                           |                              |           |       |       |                 |        |       |       |
|----------------------------------------------------------------------------------------------------------------------------------------|-----------------------------------------------------------------------------------------------------------------------------------------------------------|------------------------------|-----------|-------|-------|-----------------|--------|-------|-------|
|                                                                                                                                        | Two-way repeated measures ANOVA                                                                                                                           | Tukey (HSD)                  |           |       |       |                 |        |       |       |
| Preference based on exploratory time ( <b>DIet</b> )                                                                                   | Factor: Housing F (1,12) = 11.759, p = 0.005                                                                                                              | GH early vs GH mid           | p = 0.491 |       |       |                 |        |       |       |
|                                                                                                                                        | Factor: Maturation F (1,12) = 0.437, p = 0.521                                                                                                            | SH early vs SH mid           | p = 0.952 |       |       |                 |        |       |       |
|                                                                                                                                        | Factor: Maturation x Housing F (1,12) = 1.959, p = 0.187                                                                                                  | GH early vs SH early         | p = 0.023 |       |       |                 |        |       |       |
|                                                                                                                                        |                                                                                                                                                           | GH mid vs SH mid             | p = 0.503 |       |       |                 |        |       |       |
| Figure 5A                                                                                                                              |                                                                                                                                                           |                              |           |       |       |                 |        |       |       |
|                                                                                                                                        | Two-way repeated measures ANOVA                                                                                                                           | Tukey (HSD)                  |           |       |       |                 |        |       |       |
| Number of entries in section with familiar conspecific ( <b>N1</b> )                                                                   | Factor: Housing F (1,11) = 14.442, p = 0.003                                                                                                              | GH early vs GH mid           | p = 0.918 |       |       |                 |        |       |       |
|                                                                                                                                        | Factor: Maturation F (1,11) = 0.804, p = 0.389                                                                                                            | SH early vs SH mid           | p = 0.243 |       |       |                 |        |       |       |
|                                                                                                                                        | Factor: Maturation x Housing F (1,11) = 3.360, p = 0.094                                                                                                  | GH early vs SH early         | p = 0.001 |       |       |                 |        |       |       |
|                                                                                                                                        |                                                                                                                                                           | GH mid vs SH mid             | p = 0.998 |       |       |                 |        |       |       |
| Number of entries in section with novel conspecific ( <b>N2</b> )                                                                      | Factor: Housing F (1,11) = 0.179, p = 0.680<br>Factor: Maturation F (1,11) = 0.460, p = 0.512<br>Factor: Maturation x Housing F (1,11) = 0.827, p = 0.383 | Post hoc test not applicable |           |       |       |                 |        |       |       |
| Total number of entries in both sections ( <b>N1 + N2</b> )                                                                            | Factor: Housing F (1,11) = 5.788, p = 0.035                                                                                                               | GH early vs GH mid           | p = 0.970 |       |       |                 |        |       |       |
|                                                                                                                                        | Factor: Maturation F (1,11) = 0.696, p = 0.422                                                                                                            | SH early vs SH mid           | p = 0.366 |       |       |                 |        |       |       |
|                                                                                                                                        | Factor: Maturation x Housing F (1,11) = 2.199, p = 0.166                                                                                                  | GH early vs SH early         | p = 0.014 |       |       |                 |        |       |       |
|                                                                                                                                        |                                                                                                                                                           | GH mid vs SH mid             | p = 0.953 |       |       |                 |        |       |       |
| Figure 5B                                                                                                                              |                                                                                                                                                           |                              |           |       |       |                 |        |       |       |
|                                                                                                                                        | Two-way repeated measures ANOVA                                                                                                                           | Post hoc test                |           |       |       |                 |        |       |       |
| Preference based on number of entries in sections ( <b>DInes</b> )                                                                     | Factor: Housing F (1,11) = 1.105, p = 0.316<br>Factor: Maturation F (1,11) = 0.000, p = 0.996<br>Factor: Maturation x Housing F (1,11) = 1.011, p = 0.336 | not applicable               |           |       |       |                 |        |       |       |
| Figure 5C                                                                                                                              |                                                                                                                                                           |                              |           |       |       |                 |        |       |       |
|                                                                                                                                        |                                                                                                                                                           | early-adolescence            |           |       |       | mid-adolescence |        |       |       |
| Time spent in <b>N2</b> section vs. time spent in center ( <b>C</b> ), Wilcoxon test                                                   |                                                                                                                                                           | N                            | T         | Z     | p     | N               | T      | Z     | p     |
|                                                                                                                                        | GH                                                                                                                                                        | 6                            | 2         | 1.782 | 0.075 | 6               | 0      | 2.201 | 0.028 |
|                                                                                                                                        | SH                                                                                                                                                        | 7                            | 2         | 0.028 | 0.043 | 7               | 1      | 2.197 | 0.028 |
| Time spent in section with social novelty ( <b>N2</b> ) vs. time spent in section with social familiarity ( <b>N1</b> ), Wilcoxon test |                                                                                                                                                           | N                            | T         | Z     | p     | N               | T      | Z     | p     |
|                                                                                                                                        | GH                                                                                                                                                        | 6                            | 2         | 1.782 | 0.075 | 6               | 3      | 1.572 | 0.116 |
|                                                                                                                                        | SH                                                                                                                                                        | 7                            | 2         | 0.028 | 0.043 | 7               | 10.5   | 0.592 | 0.554 |
| Time spent in section with social familiarity ( <b>N1</b> )                                                                            | <b>Factor: Housing condition</b><br>GH vs. SH,<br>Mann Whitney U-test                                                                                     | early-adolescence            |           |       |       | mid-adolescence |        |       |       |
|                                                                                                                                        |                                                                                                                                                           | U                            | Z         |       | p     | U               | Z      |       | p     |
|                                                                                                                                        |                                                                                                                                                           | 6                            | -2.143    |       | 0.032 | 19              | -0.286 |       | 0.775 |
|                                                                                                                                        | <b>Factor: Maturation</b><br><br>Wilcoxon test                                                                                                            | early vs. mid-adolescence    |           |       |       |                 |        |       |       |
|                                                                                                                                        |                                                                                                                                                           | N                            |           | T     |       | Z               |        | p     |       |
|                                                                                                                                        |                                                                                                                                                           | GH                           |           | 6     |       | 8               |        | 0.524 |       |
|                                                                                                                                        |                                                                                                                                                           | SH                           |           | 7     |       | 9               |        | 0.485 |       |
|                                                                                                                                        |                                                                                                                                                           |                              |           |       |       |                 |        |       |       |

|                                                   |                                                                                                                                                           |   |                            |        |       |                              |       |           |       |       |  |
|---------------------------------------------------|-----------------------------------------------------------------------------------------------------------------------------------------------------------|---|----------------------------|--------|-------|------------------------------|-------|-----------|-------|-------|--|
| Time spent in center (C)                          | <b>Factor: Housing condition</b><br>GH vs. SH,<br>Mann Whitney U-test                                                                                     |   | early-adolescence          |        |       | mid-adolescence              |       |           |       |       |  |
|                                                   |                                                                                                                                                           |   | U                          | Z      | p     | U                            | Z     | p         |       |       |  |
|                                                   |                                                                                                                                                           |   | 9.5                        | -1.643 | 0.100 | 6.5                          | 2.071 | 0.038     |       |       |  |
|                                                   | <b>Factor: Maturation</b><br><br>Wilcoxon test                                                                                                            |   | early- vs. mid-adolescence |        |       |                              |       |           |       |       |  |
|                                                   |                                                                                                                                                           |   | N                          |        | T     |                              | Z     |           | p     |       |  |
| GH                                                |                                                                                                                                                           |   | 6                          |        | 6     |                              | 0.943 |           | 0.345 |       |  |
|                                                   | SH                                                                                                                                                        | 7 |                            | 6      |       | 1.352                        |       | 0.176     |       |       |  |
| Time spent in section with social novelty (N2)    | <b>Factor: Housing condition</b><br>GH vs. SH,<br>Mann Whitney U-test                                                                                     |   | early-adolescence          |        |       | mid-adolescence              |       |           |       |       |  |
|                                                   |                                                                                                                                                           |   | U                          | Z      | p     | U                            | Z     | p         |       |       |  |
|                                                   |                                                                                                                                                           |   | 11                         | 1.429  | 0.153 | 20                           | 0.143 | 0.886     |       |       |  |
|                                                   | <b>Factor: Maturation</b><br><br>Wilcoxon test                                                                                                            |   | early- vs. mid-adolescence |        |       |                              |       |           |       |       |  |
|                                                   |                                                                                                                                                           |   | N                          |        | T     |                              | Z     |           | p     |       |  |
|                                                   |                                                                                                                                                           |   | GH                         | 6      |       | 10                           |       | 0.105     |       | 0.197 |  |
|                                                   |                                                                                                                                                           |   | SH                         | 7      |       | 7                            |       | 0.183     |       | 0.237 |  |
| <b>Figure 6A</b>                                  |                                                                                                                                                           |   |                            |        |       |                              |       |           |       |       |  |
|                                                   | Two-way repeated measures ANOVA                                                                                                                           |   |                            |        |       | Post hoc test                |       |           |       |       |  |
| Number of approaches to familiar conspecific (N1) | Factor: Housing F (1,11) = 4.476, p = 0.058<br>Factor: Maturation F (1,11) = 4.227, p = 0.064<br>Factor: Maturation x Housing F (1,11) = 4.227, p = 0.064 |   |                            |        |       | not applicable               |       |           |       |       |  |
| Number of approaches to novel conspecific (N2)    | Factor: Housing F (1,11) = 1.959, p = 0.189<br>Factor: Maturation F (1,11) = 0.075, p = 0.789<br>Factor: Maturation x Housing F (1,11) = 0.165, p = 0.692 |   |                            |        |       | not applicable               |       |           |       |       |  |
| Total number of approaches (N1 + N2)              | Factor: Housing F (1,11) = 0.168, p = 0.690<br>Factor: Maturation F (1,11) = 3.866, p = 0.075<br>Factor: Maturation x Housing F (1,11) = 4.320, p = 0.062 |   |                            |        |       | not applicable               |       |           |       |       |  |
| <b>Figure 6B</b>                                  |                                                                                                                                                           |   |                            |        |       |                              |       |           |       |       |  |
|                                                   | Two-way repeated measures ANOVA                                                                                                                           |   |                            |        |       | Post hoc test                |       |           |       |       |  |
| Preference based on number of approaches (DIna)   | Factor: Housing F (1,11) = 3.254, p = 0.099<br>Factor: Maturation F (1,11) = 0.967, p = 0.347<br>Factor: Maturation x Housing F (1,11) = 0.212, p = 0.654 |   |                            |        |       | not applicable               |       |           |       |       |  |
| <b>Figure 6C</b>                                  |                                                                                                                                                           |   |                            |        |       |                              |       |           |       |       |  |
|                                                   | Two-way repeated measures ANOVA                                                                                                                           |   |                            |        |       | Tukey (HSD)                  |       |           |       |       |  |
| Time spent in N1exploration                       | Factor: Housing F (1,11) = 9.590, p = 0.010<br>Factor: Maturation F (1,11) = 1.526, p = 0.242<br>Factor: Maturation x Housing F (1,11) = 2.250, p = 0.162 |   |                            |        |       | GH early vs GH mid           |       | p = 0.998 |       |       |  |
|                                                   |                                                                                                                                                           |   |                            |        |       | SH early vs SH mid           |       | p = 0.241 |       |       |  |
|                                                   |                                                                                                                                                           |   |                            |        |       | GH early vs SH early         |       | p = 0.017 |       |       |  |
|                                                   |                                                                                                                                                           |   |                            |        |       | GH mid vs SH mid             |       | p = 0.946 |       |       |  |
| Time spent in N2 exploration                      | Factor: Housing F (1,11) = 0.018, p = 0.897<br>Factor: Maturation F (1,11) = 0.006, p = 0.939<br>Factor: Maturation x Housing F (1,11) = 0.026, p = 0.875 |   |                            |        |       | Post hoc test not applicable |       |           |       |       |  |

|                                                              |                                                                                                                                                            |   |     |       |                                                          |                              |    |           |       |
|--------------------------------------------------------------|------------------------------------------------------------------------------------------------------------------------------------------------------------|---|-----|-------|----------------------------------------------------------|------------------------------|----|-----------|-------|
| Total exploratory time<br>(N1 + N2)                          | Factor: Housing F (1,11) = 2.056, p = 0.179<br>Factor: Maturation F (1,11) = 0.673, p = 0.429<br>Factor: Maturation x Housing F (1,11) = 1.433, p = 0.256  |   |     |       |                                                          | Post hoc test not applicable |    |           |       |
| Figure 6D                                                    |                                                                                                                                                            |   |     |       |                                                          |                              |    |           |       |
|                                                              | Two-way repeated measures ANOVA                                                                                                                            |   |     |       |                                                          | Post hoc test                |    |           |       |
| Preference based on exploratory time (DI <sub>et</sub> )     | Factor: Housing F (1,11) = 4.695, p = 0.053<br>Factor: Maturation F (1,11) = 0.665, p = 0.432<br>Factor: Maturation x Housing F (1,11) = 0.251, p = 0.626  |   |     |       |                                                          | not applicable               |    |           |       |
| Figure 7A                                                    |                                                                                                                                                            |   |     |       |                                                          |                              |    |           |       |
|                                                              | Two-way repeated measures ANOVA                                                                                                                            |   |     |       |                                                          | Tukey (HSD)                  |    |           |       |
| Number of approaches to a box with social odor 1 (S1)        | Factor: Housing F (1,14) = 0.041, p = 0.843<br>Factor: Maturation F (1,14) = 6.723, p = 0.021<br>Factor: Maturation x Housing F (1,14) = 3.478, p = 0.083  |   |     |       |                                                          | GH early vs GH mid           |    | p = 0.954 |       |
|                                                              |                                                                                                                                                            |   |     |       |                                                          | SH early vs SH mid           |    | p = 0.032 |       |
|                                                              |                                                                                                                                                            |   |     |       |                                                          | GH early vs SH early         |    | p = 0.763 |       |
|                                                              |                                                                                                                                                            |   |     |       |                                                          | GH mid vs SH mid             |    | p = 0.898 |       |
|                                                              | Factor: Maturation under given housing conditions early- vs. mid-adolescence, Wilcoxon test                                                                |   |     |       | Factor: Housing conditions GH vs SH, Mann Whitney U-test |                              |    |           |       |
|                                                              |                                                                                                                                                            | N | T   | Z     | p                                                        |                              | U  | Z         | p     |
| Number of approaches to a box with no smell (NS)             | GH                                                                                                                                                         | 8 | 10  | 0.676 | 0.499                                                    | early                        | 22 | -1.05     | 0.294 |
|                                                              | SH                                                                                                                                                         | 8 | 9.5 | 1.190 | 0.234                                                    | mid                          | 20 | -1.26     | 0.208 |
|                                                              | Two-way repeated measures ANOVA                                                                                                                            |   |     |       |                                                          | Tukey (HSD)                  |    |           |       |
| Total number of approaches (S1 + NS)                         | Factor: Housing F (1,14) = 0.623, p = 0.443<br>Factor: Maturation F (1,14) = 4.718, p = 0.048<br>Factor: Maturation x Housing F (1,14) = 0.590, p = 0.455  |   |     |       |                                                          | GH early vs GH mid           |    | p = 0.756 |       |
|                                                              |                                                                                                                                                            |   |     |       |                                                          | SH early vs SH mid           |    | p = 0.208 |       |
|                                                              |                                                                                                                                                            |   |     |       |                                                          | GH early vs SH early         |    | p = 1.000 |       |
|                                                              |                                                                                                                                                            |   |     |       |                                                          | GH mid vs SH mid             |    | p = 0.719 |       |
| Figure 7B                                                    |                                                                                                                                                            |   |     |       |                                                          |                              |    |           |       |
|                                                              | Factor: Maturation under given housing conditions Early- vs. mid-adolescence, Wilcoxon test                                                                |   |     |       | Factor: Housing conditions GH vs SH, Mann Whitney U-test |                              |    |           |       |
|                                                              |                                                                                                                                                            | N | T   | Z     | p                                                        |                              | U  | Z         | p     |
| Preference based on number of approaches (DI <sub>na</sub> ) | GH                                                                                                                                                         | 8 | 12  | 0.840 | 0.401                                                    | early                        | 13 | 1.995     | 0.046 |
|                                                              | SH                                                                                                                                                         | 8 | 10  | 0.676 | 0.499                                                    | mid                          | 30 | 0.210     | 0.834 |
| Figure 7C                                                    |                                                                                                                                                            |   |     |       |                                                          |                              |    |           |       |
|                                                              | Two-way repeated measures ANOVA                                                                                                                            |   |     |       |                                                          | Tukey (HSD)                  |    |           |       |
| Time spent in exploration of a box with social odor 1 (S1)   | Factor: Housing F (1,14) = 3.864, p = 0.070<br>Factor: Maturation F (1,14) = 10.860, p = 0.005<br>Factor: Maturation x Housing F (1,14) = 5.913, p = 0.029 |   |     |       |                                                          | GH early vs GH mid           |    | p = 0.927 |       |
|                                                              |                                                                                                                                                            |   |     |       |                                                          | SH early vs SH mid           |    | p = 0.006 |       |
|                                                              |                                                                                                                                                            |   |     |       |                                                          | GH early vs SH early         |    | p = 0.049 |       |
|                                                              |                                                                                                                                                            |   |     |       |                                                          | GH mid vs SH mid             |    | p = 0.999 |       |
| Time spent in exploration of a box with no smell (NS)        | Factor: Housing F (1,14) = 1.391, p = 0.258<br>Factor: Maturation F (1,14) = 10.971, p = 0.005<br>Factor: Maturation x Housing F (1,14) = 0.040, p = 0.844 |   |     |       |                                                          | GH early vs GH mid           |    | p = 0.106 |       |
|                                                              |                                                                                                                                                            |   |     |       |                                                          | SH early vs SH mid           |    | p = 0.171 |       |
|                                                              |                                                                                                                                                            |   |     |       |                                                          | GH early vs SH early         |    | p = 0.769 |       |
|                                                              |                                                                                                                                                            |   |     |       |                                                          | GH mid vs SH mid             |    | p = 0.896 |       |

|                                                                            |                                                                                                                                                           |   |     |       |       |                                                          |           |       |       |
|----------------------------------------------------------------------------|-----------------------------------------------------------------------------------------------------------------------------------------------------------|---|-----|-------|-------|----------------------------------------------------------|-----------|-------|-------|
| Total exploratory time ( <b>S1</b> + <b>NS</b> )                           | Factor: Housing F (1,14) = 0.478, p = 0.402                                                                                                               |   |     |       |       | GH early vs GH mid                                       | p = 0.490 |       |       |
|                                                                            | Factor: Maturation F (1,14) = 15.381, p = 0.002                                                                                                           |   |     |       |       | SH early vs SH mid                                       | p = 0.005 |       |       |
|                                                                            | Factor: Maturation x Housing F (1,14) = 3.488, p = 0.083                                                                                                  |   |     |       |       | GH early vs SH early                                     | p = 0.301 |       |       |
|                                                                            |                                                                                                                                                           |   |     |       |       | GH mid vs SH mid                                         | p = 0.928 |       |       |
| Figure 7D                                                                  |                                                                                                                                                           |   |     |       |       |                                                          |           |       |       |
|                                                                            | Factor: Maturation under given housing conditions early- vs. mid-adolescence, Wilcoxon test                                                               |   |     |       |       | Factor: Housing conditions GH vs SH, Mann Whitney U-test |           |       |       |
|                                                                            |                                                                                                                                                           | N | T   | Z     | p     |                                                          | U         | Z     | p     |
| Preference based on exploratory time ( <b>D1et</b> )                       | GH                                                                                                                                                        | 8 | 14  | 0.560 | 0.575 | early                                                    | 9         | 2,415 | 0.016 |
|                                                                            | SH                                                                                                                                                        | 8 | 3   | 2.100 | 0.036 | mid                                                      | 27        | 0,525 | 0.600 |
| Figure 8A                                                                  |                                                                                                                                                           |   |     |       |       |                                                          |           |       |       |
|                                                                            | Two-way repeated measures ANOVA                                                                                                                           |   |     |       |       | Post hoc test                                            |           |       |       |
| Number of approaches to a box with familiar social odor ( <b>S1</b> )      | Factor: Housing F (1,14) = 2.168, p = 0.163<br>Factor: Maturation F (1,14) = 0.107, p = 0.748<br>Factor: Maturation x Housing F (1,14) = 4.834, p = 0.055 |   |     |       |       | not applicable                                           |           |       |       |
| Number of approaches to a box with novel social odor ( <b>S2</b> )         | Factor: Housing F (1,14) = 0.305, p = 0.590<br>Factor: Maturation F (1,14) = 0.888, p = 0.362<br>Factor: Maturation x Housing F (1,14) = 0.284, p = 0.603 |   |     |       |       | not applicable                                           |           |       |       |
| Total number of approaches ( <b>S1</b> + <b>S2</b> )                       | Factor: Housing F (1,14) = 2.028, p = 0.176<br>Factor: Maturation F (1,14) = 0.671, p = 0.426<br>Factor: Maturation x Housing F (1,14) = 0.862, p = 0.369 |   |     |       |       | not applicable                                           |           |       |       |
| Figure 8B                                                                  |                                                                                                                                                           |   |     |       |       |                                                          |           |       |       |
|                                                                            | Two-way repeated measures ANOVA                                                                                                                           |   |     |       |       | Post hoc test                                            |           |       |       |
| Preference based on number of approaches ( <b>D1na</b> )                   | Factor: Housing F (1,14) = 0.340, p = 0.569<br>Factor: Maturation F (1,14) = 0.134, p = 0.720<br>Factor: Maturation x Housing F (1,14) = 3.932, p = 0.067 |   |     |       |       | not applicable                                           |           |       |       |
| Figure 8C                                                                  |                                                                                                                                                           |   |     |       |       |                                                          |           |       |       |
|                                                                            | Two-way repeated measures ANOVA                                                                                                                           |   |     |       |       | Post hoc test                                            |           |       |       |
| Time spent in exploration of a box with familiar social odor ( <b>S1</b> ) | Factor: Housing F (1,14) = 1.036, p = 0.326<br>Factor: Maturation F (1,14) = 0.048, p = 0.830<br>Factor: Maturation x Housing F (1,14) = 2.194, p = 0.161 |   |     |       |       | not applicable                                           |           |       |       |
|                                                                            | Factor: Maturation under given housing conditions early- vs. mid-adolescence, Wilcoxon test                                                               |   |     |       |       | Factor: Housing conditions GH vs SH, Mann Whitney U-test |           |       |       |
|                                                                            |                                                                                                                                                           | N | T   | Z     | p     |                                                          | U         | Z     | p     |
| Time spent in exploration of a box with novel social odor ( <b>S2</b> )    | GH                                                                                                                                                        | 8 | 5.5 | 1.750 | 0.080 | early                                                    | 20.5      | 1.208 | 0.227 |
|                                                                            | SH                                                                                                                                                        | 8 | 6   | 1.680 | 0.093 | mid                                                      | 22.5      | 0.998 | 0.318 |

|                                                                          |                                                                                                   |     |        |       |                                                          |                      |        |           |       |
|--------------------------------------------------------------------------|---------------------------------------------------------------------------------------------------|-----|--------|-------|----------------------------------------------------------|----------------------|--------|-----------|-------|
| Total exploratory time (S1 + S2)                                         | GH                                                                                                | 8   | 11.5   | 0.910 | 0.363                                                    | early                | 17.5   | 1.523     | 0.128 |
|                                                                          | SH                                                                                                | 8   | 6      | 1.680 | 0.093                                                    | mid                  | 27     | 0.525     | 0.600 |
| Figure 8D                                                                |                                                                                                   |     |        |       |                                                          |                      |        |           |       |
| Preference based on exploratory time (DIet)                              | Factor: Housing F (1,14) = 0.400, p = 0.537                                                       |     |        |       |                                                          | GH early vs GH mid   |        | p = 0.186 |       |
|                                                                          | Factor: Maturation F (1,14) = 5.497, p = 0.034                                                    |     |        |       |                                                          | SH early vs SH mid   |        | p = 0.657 |       |
|                                                                          | Factor: Maturation x Housing F (1,14) = 0.483, p = 0.499                                          |     |        |       |                                                          | GH early vs SH early |        | p = 0.780 |       |
|                                                                          |                                                                                                   |     |        |       |                                                          | GH mid vs SH mid     |        | p = 1.000 |       |
| Figure 9C                                                                |                                                                                                   |     |        |       |                                                          |                      |        |           |       |
|                                                                          | Factor: Maturation under given housing conditions early- vs. mid-adolescence, Mann Whitney U-test |     |        |       | Factor: Housing conditions GH vs SH, Mann Whitney U-test |                      |        |           |       |
|                                                                          |                                                                                                   | T   | Z      | p     |                                                          | U                    | Z      | p         |       |
| Neurons with PV+ immunoreactivity in CA1 (number per section/side/brain) | GH                                                                                                | 8   | 0      | 1     | early                                                    | 7                    | 0.289  | 0.773     |       |
|                                                                          | SH                                                                                                | 5   | -0.866 | 0.386 | mid                                                      | 8                    | 0      | 1         |       |
| Figure 9D                                                                |                                                                                                   |     |        |       |                                                          |                      |        |           |       |
|                                                                          | Factor: Maturation under given housing conditions early- vs. mid-adolescence, Mann Whitney U-test |     |        |       | Factor: Housing conditions GH vs SH, Mann Whitney U-test |                      |        |           |       |
|                                                                          |                                                                                                   | T   | Z      | p     |                                                          | U                    | Z      | p         |       |
| Neurons with PV+ immunoreactivity in CA2 (number per section/side/brain) | GH                                                                                                | 5   | 0.866  | 0.386 | early                                                    | 4                    | -1.155 | 0.248     |       |
|                                                                          | SH                                                                                                | 7   | -0.289 | 0.773 | mid                                                      | 6.5                  | -0.433 | 0.665     |       |
| Figure 9E                                                                |                                                                                                   |     |        |       |                                                          |                      |        |           |       |
|                                                                          | Factor: Maturation under given housing conditions early- vs. mid-adolescence, Mann Whitney U-test |     |        |       | Factor: Housing conditions GH vs SH, Mann Whitney U-test |                      |        |           |       |
|                                                                          |                                                                                                   | T   | Z      | p     |                                                          | U                    | Z      | p         |       |
| Neurons with PV+ immunoreactivity in CA3 (number per section/side/brain) | GH                                                                                                | 1   | -2.021 | 0.043 | early                                                    | 7.5                  | -0.144 | 0.885     |       |
|                                                                          | SH                                                                                                | 0   | -2.309 | 0.021 | mid                                                      | 5                    | 0.866  | 0.386     |       |
| Figure 10B                                                               |                                                                                                   |     |        |       |                                                          |                      |        |           |       |
|                                                                          | Factor: Maturation under given housing conditions early- vs. mid-adolescence, Mann Whitney U-test |     |        |       | Factor: Housing conditions GH vs SH, Mann Whitney U-test |                      |        |           |       |
|                                                                          |                                                                                                   | T   | Z      | p     |                                                          | U                    | Z      | p         |       |
| Neurons with PV+ immunoreactivity in DG (number per section/side/brain)  | GH                                                                                                | 4.5 | 1.010  | 0.312 | early                                                    | 1                    | 2.021  | 0.043     |       |
|                                                                          | SH                                                                                                | 4   | -1.155 | 0.248 | mid                                                      | 4                    | 1.155  | 0.248     |       |
